# Supplementary material for: Exploring evolutionary mechanisms of genomic divergence in Scurria limpets
Source: Research Square preprint supplement (doi:10.21203/rs.3.rs-4682442/v1), 2024-09-02
Supplement: Supplementary file 1 [file 13bae68bacc2e0a40d483953.pdf]

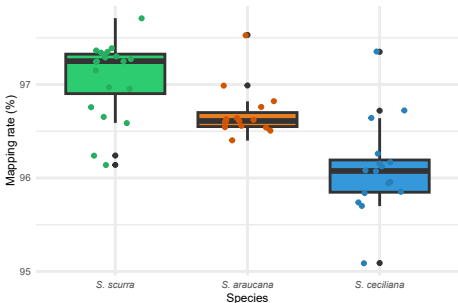

Figure S1. Boxplot of the mapping rate among three different species: *S. scurra*, *S. araucana*, and *S. cecilians*. Each box represents the distribution of the mapping rate for each species. The boxes show the interquartile range (IQR), with the central line indicating the median. The whiskers extend to the most extreme values within 1.5 times the IQR from the lower and upper quartiles. Points outside this range are considered outliers and are shown as individual points.
