# Supplementary material for: Exploring evolutionary mechanisms of genomic divergence in Scurria limpets
Source: Research Square preprint supplement (doi:10.21203/rs.3.rs-4682442/v1), 2024-09-02
Supplement: Supplementary file 1 [file 4039d592f5f7ee39ad0ad4a5.xlsx]

## Sheet: Hoja1
	Table 1. Number of windows with outlier values calculated across the 9 chromosomes of the three species, using the reference genome of S. scurra. The codes TE, CN, CH, and MA represent the Temblador, Concepción, Chiloé, and Magallanes populations, respectively. Outliers were classified as follows: above the 99th percentile of the mean FST values, above the 95th percentile of the mean DXY values, …
			Chromosomes
	Specie	Outlier Classification	ch01	ch02	ch03	ch04	ch05	ch06	ch07	ch08	ch09	Number of Genomic regions	Mean Size of Genomic regions
	S. scurra	Above the 99 percentile FST	0	13	10	33	26	37	25	4	11
	(TE-CN)	Above the 95 percentile DXY	232	102	54	120	53	40	32	105	55
		Below the 95 percentile DXY	245	2496	1568	2047	1258	2384	1657	1886	1506
		Shared
		Above 99 percentile FST and 95 percentile DXY	0	1	1	18	3	5	13	3	1	45	33333.3
		Above 99 percentile FST and below 95 percentile DXY	0	12	9	15	23	32	12	1	10	114	25618
	S. araucana	Above the 99 percentile FST	6	42	14	28	7	4	36	8	14
	(TE-CN)	Above the 95 percentile DXY	261	152	81	94	39	47	15	43	61
		Below the 95 percentile DXY	225	2447	1540	2072	1272	2377	1674	1948	1500
		Shared
		Above 99 percentile FST and 95 percentile DXY	0	3	0	1	0	0	0	1	0	5	25000
		Above 99 percentile FST and below 95 percentile DXY	6	39	14	27	7	4	36	7	14	154	29333.3
	S. ceciliana	Above the 99 percentile FST	0	9	1	1	3	1	0	92	52
	(CH-MA)	Above the 95 percentile DXY	263	162	88	13	35	14	40	96	82
		Below the 95 percentile DXY	223	2438	1533	2154	1276	2410	1649	1894	1479
		Shared
		Above 99 percentile FST and 95 percentile DXY	0	8	0	0	1	0	0	61	2	72	45000
		Above 99 percentile FST and below 95 percentile DXY	0	1	1	1	2	1	0	31	50	87	34800
