# Supplementary material for: Exploring evolutionary mechanisms of genomic divergence in Scurria limpets
Source: Research Square preprint supplement (doi:10.21203/rs.3.rs-4682442/v1), 2024-09-02
Supplement: Supplementary file 2 [file 7b7d4990efc48178c645db1f.xlsx]

## Sheet: Hoja1
	Table 2. Summary of the number of genomic regions identified from scans of 20 kb windows per model (DGF=Divergence with Gene Flow, DA=Divergence in Allopatry) and species. Genomic regions containing genes are identified, including the number of genes present in these regions, as well as the number of transcripts and the number of transcripts with associated ontology.
	Species	Model	Number of Genomic regions	Genomic regions with genes	Number of genes	Number of transcripts	Number of transcripts with ontology
	S. scurra	DGF	45	23	71	72	50
		DA	114	69	155	157	105
	S. araucana	DGF	5	3	10	10	7
		DA	154	89	225	227	157
	S. ceciliana	DGF	72	27	136	140	65
		DA	87	41	148	148	111
