# Supplementary material for: Exploring evolutionary mechanisms of genomic divergence in Scurria limpets
Source: Research Square preprint supplement (doi:10.21203/rs.3.rs-4682442/v1), 2024-09-02
Supplement: Supplementary file 3 [file 8838f8f0f46da7ad1682d7c8.xlsx]

## Sheet: Hoja1
	Table S3. List of shared and unique genes in the three species, associated with the Divergence with Gene Flow (DGF) model. The table also presents the ratio of non-synonymous to synonymous substitutions (pN/pS) and the corresponding gene ontology.
	Species	geneID	pN/pS	Ontology term
	Shared
	S. scurra	g22915	1.9	-Lipid metabolic process
	S. araucana			-Extracellular region
				-Hydrolase activity
	Unique
	S. scurra	g1122	1.15	-membrane
	S. scurra	g15576	1.48	-DNA binding
				-transcription initiation at RNA polymerase III promoter
				-transcription factor TFIIIC complex
				-cellular anatomical entity
				-ncRNA transcription
				-cellular macromolecule biosynthetic process
	S. scurra	g15578	2.01	-Signaling
				-programmed cell death
	S. scurra	g15741	2.34	-membrane
	S. scurra	g15747	2.29	-mRNA cleavage and polyadenylation specificity factor complex
				-membrane
				-mRNA polyadenylation
	S. scurra	g19258	2.18	-transmembrane transport
				-membrane
				-symporter activity
				-anion transport
	S. scurra	g3038	Inf	-oxidoreductase activity
	S. scurra	g3039	2.35	-extracellular space
	S. scurra	g9109	1.2	-G protein-coupled receptor activity
				-G protein-coupled receptor signaling pathway
				-plasma membrane
	S. araucana	g15029	1.01	-ATP hydrolysis activity
				-ABC-type bile acid transporter activity
				-lateral plasma membrane
				-ABC-type glutathione S-conjugate transporter activity
				-Golgi apparatus
				-cobalamin metabolic process
				-ATPase-coupled inorganic anion transmembrane transporter activity
				-macromolecule transmembrane transporter activity
				-cell chemotaxis
				-xenobiotic detoxification by transmembrane export across the plasma membrane
				-xenobiotic transport across blood-brain barrier
				-phospholipid translocation
				-heme export from vacuole to cytoplasm
				-culmination involved in sorocarp development
				-efflux transmembrane transporter activity
				-glucuronoside transmembrane transporter activity
				-positive regulation of inflammatory response
				-ABC-type xenobiotic transporter activity
				-long-chain fatty acid transporter activity
				-cytoplasmic vesicle membrane
				-sphingolipid translocation
				-xenobiotic metabolic process
				-response to estradiol
				-glutathione transmembrane transport
				-transepithelial transport
				-ABC-type heme transporter activity
				-long-chain fatty acid import across plasma membrane
				-hyaluronan biosynthetic process
				-basolateral plasma membrane
				-apical plasma membrane
				-positive regulation of cell migration
				-leukotriene transport
				-ATP binding
				-response to oxidative stress
				-xenobiotic transmembrane transport
				-endosome
				-response to insulin
				-icosanoid transmembrane transporter activity
				-cobalamin transport
				-folate transmembrane transport
				-canalicular bile acid transport
				-ABC-type vitamin B12 transporter activity
				-fungal-type vacuole membrane
				-cellular response to amyloid-beta
				-negative regulation of neuron death
				-heme binding
				-perinuclear region of cytoplasm
				-intracellular organelle lumen
				-cGMP transport
				-sorocarp morphogenesis
				-response to lipopolysaccharide
				-cAMP transport
				-purine nucleotide transmembrane transporter activity
				-phospholipid efflux
				-glutathione transmembrane transporter activity
	S. araucana	g15031	1.16	-ATP hydrolysis activity
				-xenobiotic transmembrane transporter activity
				-xenobiotic export from cell
				-organic cyclic compound metabolic process
				-sulfur compound transmembrane transporter activity
				-negative regulation of cell death
				-organonitrogen compound metabolic process
				-cellular response to oxygen-containing compound
				-positive regulation of biological process
				-transport across blood-brain barrier
				-small molecule metabolic process
				-heterocycle metabolic process
				-ATP binding
				-basal plasma membrane
				-ABC-type transporter activity
				-anion transmembrane transport
				-cellular response to endogenous stimulus
				-cellular response to lipid
				-export across plasma membrane
				-sorocarp development
				-icosanoid transport
				-bile acid and bile salt transport
				-regulation of biological quality
				-antibiotic metabolic process
				-ATPase-coupled lipid transmembrane transporter activity
				-nitrogen compound transport
				-carboxylic acid transmembrane transport
				-response to peptide
				-response to steroid hormone
				-organic anion transmembrane transporter activity
				-cellular catabolic process
				-response to stress
				-carboxylic acid transmembrane transporter activity
				-amide transmembrane transporter activity
				-protein binding
				-cytoplasm
				-xenobiotic metabolic process
				-regulation of gene expression
				-phospholipid transport
				-response to lipopolysaccharide
				-cellular response to cytokine stimulus
				-apical plasma membrane
				-detoxification of mercury ion
	S. ceciliana	g12028	1.11	-biological regulation
				-cellular transition metal ion homeostasis
				-nucleus
				-superoxide metabolic process
				-antioxidant activity
				-copper ion binding
				-oxidoreductase activity
				-cytoplasm
				-cellular response to oxidative stress
				-cellular response to oxygen-containing compound
				-response to toxic substance
	S. ceciliana	g3630	1.21	-DNA binding
				-oxidoreductase activity
	S. ceciliana	g3833	1	-structural constituent of ribosome
				-cytoplasmic translational elongation
				-cytosolic large ribosomal subunit
	S. ceciliana	g3850	2	-mitochondrion
	S. ceciliana	g3855	1.18	-Nucleus
				-nucleosome binding
				-cellular component assembly
				-regulation of DNA-templated transcription
				-protein-containing complex
				-DNA conformation change-chromatin organization
	S. ceciliana	g3859	1.54	-transferase activity
	S. ceciliana	g3887	1.55	-positive regulation of phosphate metabolic process
				-protein phosphatase binding
				-negative regulation of phosphate metabolic process
				-protein serine/threonine phosphatase complex
				-endoplasmic reticulum
				-regulation of phosphoprotein phosphatase activity
				-vacuole
				-plasma membrane
				-positive regulation of hydrolase activity
				-phosphoprotein phosphatase activity
				-cellular macromolecule metabolic process
				-response to endoplasmic reticulum stress
				-negative regulation of protein modification process
				-protein phosphatase regulator activity
				-positive regulation of protein modification process
	S. ceciliana	g3892	1.76	-ATP hydrolysis activity
				-nucleus
				-ATP binding
				-DNA helicase activity
				-DNA replication
				-DNA duplex unwinding
				-membrane
				-double-strand break repair via homologous recombination
				-MCM complex
				-MCM core complex
				-single-stranded DNA binding
	S. ceciliana	g3909	1.68	-zinc ion binding
				-carbonate dehydratase activity
				-extracellular region
				-plasma membrane
	S. ceciliana	g7048	1.03	-site of double-strand break
				-negative regulation of double-strand break repair
				-histone H2A-K13 ubiquitination
				-histone H2A-K15 ubiquitination
				-interstrand cross-link repair
				-DNA repair complex
				-nucleoplasm
				-ubiquitin binding
				-histone H2A monoubiquitination
				-cellular response to UV
				-cytosol
				-response to ionizing radiation
				-isotype switching
				-positive regulation of DNA repair
				-negative regulation of transcription elongation by RNA polymerase II
				-regulation of protein localization
				-nucleosome binding
				-ubiquitin-dependent protein catabolic process
				-ubiquitin-protein transferase activity
				-ubiquitin ligase complex
				-histone binding
				-metal ion binding
				-K63-linked polyubiquitin modification-dependent protein binding
				-membrane
				-histone H2A K63-linked ubiquitination
	S. ceciliana	g9865	1.15	-extracellular space
				-multicellular organism reproduction
	S. ceciliana	g9866	2.28	-regulation of biological quality
				-retina homeostasis
				-chaperone-mediated protein complex assembly
