# Supplementary material for: Exploring evolutionary mechanisms of genomic divergence in Scurria limpets
Source: Research Square preprint supplement (doi:10.21203/rs.3.rs-4682442/v1), 2024-09-02
Supplement: Supplementary file 4 [file 90513650282a967bbda83b9d.xlsx]

## Sheet: Hoja1
	Table S1. Summary of sequencing data quality. The codes Ssc, Sar, and Sce refer to individuals of the species Scurria scurra, Scurria araucana, and Scurria ceciliana from the populations TE=Temblador, CN=Concepción, CH=Chiloé, and MA=Magallanes.
	Sample	Clean Reads	Mapped reads	Mapping rate	Q20(%)	Clean Base (G)
	Ssc TE01	16140777	32215522	96.24 (%)	96.66	4.84223
	Ssc TE02	16108843	32555566	97.39 (%)	96.73	4.83265
	Ssc TE03	16138769	32461643	96.95 (%)	96.5	4.84163
	Ssc TE04	16110016	32303454	96.65 (%)	96.34	4.833
	Ssc TE05	16126581	32145252	96.14 (%)	96.38	4.83797
	Ssc TE06	16086277	32504053	97.32 (%)	96.52	4.82588
	Ssc TE07	16114978	32518003	97.24 (%)	96.32	4.83449
	Ssc TE08	16090124	32444177	97.15 (%)	96.28	4.82704
	Ssc TE11	16102111	32527589	97.35 (%)	96.55	4.83063
	Ssc TE15	16039270	32131774	96.59 (%)	96.43	4.81178
	Ssc CN01	16071963	32217178	96.97 (%)	96.12	4.82159
	Ssc CN02	16079152	32339041	97.27 (%)	96.14	4.82375
	Ssc CN04	16119344	32422679	97.25 (%)	96.19	4.8358
	Ssc CN06	16049408	32095385	97.71 (%)	96.44	4.81482
	Ssc CN08	16086937	32381590	97.34 (%)	96.46	4.82608
	Ssc CN09	16107012	32390700	97.25 (%)	96.31	4.8321
	Ssc CN10	15885643	31962509	97.29 (%)	96.3	4.76569
	Ssc CN11	16068018	32328519	97.30 (%)	96.39	4.82041
	Ssc CN12	16052800	32325632	97.36 (%)	96.49	4.81584
	Ssc CN13	16078261	32165456	96.76 (%)	96.25	4.82348
	Sar TE02	16050447	32857183	96.76 (%)	97.53	4.81513
	Sar TE03	16023135	32728499	96.61 (%)	96.37	4.80694
	Sar TE04	16137852	32950619	96.61 (%)	96.27	4.84136
	Sar TE05	16088315	32878135	96.62 (%)	97.21	4.82649
	Sar TE06	16123135	33119495	96.99 (%)	97.8	4.83694
	Sar TE07	16058711	32792591	96.54 (%)	97.06	4.81761
	Sar TE11	16027932	32838957	96.82 (%)	97.39	4.80838
	Sar TE12	16068865	32829518	96.54 (%)	97.09	4.82066
	Sar TE14	16036087	32761628	96.56 (%)	97.12	4.81083
	Sar TE16	16055752	32828333	96.63 (%)	97.17	4.81673
	Sar CN01	16037592	32775420	96.51 (%)	97.14	4.81128
	Sar CN03	16055163	32841175	96.64 (%)	96.92	4.81655
	Sar CN09	16029514	33133083	97.53 (%)	98.28	4.80885
	Sar CN11	16116897	32892440	96.40 (%)	96.36	4.83507
	Sar CN12	16136353	32971152	96.60 (%)	96.05	4.84091
	Sce CH01	16135120	32948502	96.12 (%)	96.84	4.84054
	Sce CH02	16135619	32870471	95.96 (%)	96.38	4.84069
	Sce CH03	15715505	32054706	96.07 (%)	96.42	4.71465
	Sce CH04	16094635	32774635	95.94 (%)	96.24	4.82839
	Sce CH05	16068558	32653806	95.74 (%)	96.44	4.82057
	Sce CH06	16095920	32465679	95.09 (%)	95.82	4.82878
	Sce CH07	16123247	32788611	95.85 (%)	95.93	4.83697
	Sce CH08	16077576	32820120	96.17 (%)	96.41	4.82327
	Sce CH10	15940879	32521127	96.08 (%)	96.38	4.78226
	Sce CH11	16075341	32703125	95.84 (%)	96.25	4.8226
	Sce MA01	16112204	32703183	95.70 (%)	96.58	4.83366
	Sce MA02	16100134	33059914	96.64 (%)	98.36	4.83004
	Sce MA03	16084169	32805208	96.26 (%)	96.72	4.82525
	Sce MA04	16070122	33216418	97.35 (%)	98.25	4.82104
	Sce MA05	16016282	32865906	96.72 (%)	96.86	4.80488
	Sce MA06	16098199	32912139	96.15 (%)	96.81	4.82946
	Total	819645544	1663797500	4929.56	4930.25	245.894
	Mean	16073288	3.26504e+07	96.658	96.6761	4.82199
