# Supplementary material for: Exploring evolutionary mechanisms of genomic divergence in Scurria limpets
Source: Research Square preprint supplement (doi:10.21203/rs.3.rs-4682442/v1), 2024-09-02
Supplement: Supplementary file 5 [file a0ad7b79369b182d248de4f0.xlsx]

## Sheet: Hoja1
	Table S2. Number of filtered and analyzed SNPs in this study for each species and population. The number of individuals analyzed per population is shown in parentheses.
	Population	S. araucana	S. scurra	S. ceciliana
	Temblador	6,888,985 (n=10)	5,756,211 (n=10)
	Concepción	3,801,687 (n=5)	6,027,035 (n=10)
	Chiloé			5,939,690 (n=10)
	Magallanes			4,471,003 (n=6)
